# Supplementary material for: Identification of long non-coding RNA ZFAS1 as a novel biomarker for diagnosis of HCC
Source: PubMed Central journal article supplement (PMC6050191; doi:10.1042/bsr20171359), 2018-07-18
Supplement: bsr20171359_Supp1.pdf [file bsr20171359_Supp1.pdf]

**Supplemental Table 1. Demographic and clinical characteristics of HCC patients.**

| NO. | Sex    | Age | Smoking | Alcoholism | Differentiation | TNM | Size(cm)      | ALT(U/l) | AST(U/l) | TP(g/l) | ALB(g/l) |
|-----|--------|-----|---------|------------|-----------------|-----|---------------|----------|----------|---------|----------|
| 1   | Male   | 43  | No      | No         | poorly          | III | 13*10         | 24       | 25       | 63.6    | 41.2     |
| 2   | Male   | 57  | Yes     | Yes        | moderate        | II  | 8*7*5         | 50       | 65       | 65.3    | 34.5     |
| 3   | Male   | 52  | Yes     | No         | moderate        | II  | 9.6*8         | 80       | 57       | 69.3    | 39.3     |
| 4   | Male   | 52  | No      | No         | moderate        | III | 9.7*16.3*13.3 | 79       | 108      | 638     | 32       |
| 5   | Male   | 61  | Yes     | Yes        | moderate        | III | 15.8*11.2     | 148      | 100      | 58.6    | 39       |
| 6   | Female | 63  | Yes     | No         | poorly          | II  | 13*12         | 57       | 57       | 57.5    | 35.3     |
| 7   | Male   | 57  | Yes     | No         | moderate        | II  | 3.2*4.3       | 49       | 43       | 69.4    | 27.5     |
| 8   | Male   | 79  | No      | Yes        | moderate        | III | 13.6*9.6      | 21       | 24       | 58      | 32.5     |
| 9   | Male   | 64  | Yes     | Yes        | moderate        | II  | 7*6*5         | 68       | 67       | 72.5    | 42.5     |
| 10  | Male   | 70  | Yes     | No         | moderate        | III | 16.3*13.6     | 50       | 66       | 79.2    | 40       |
| 11  | Female | 51  | Yes     | No         | moderate        | III | 12.2*11.4     | 24       | 92       | 57.8    | 36.6     |
| 12  | Male   | 51  | No      | No         | moderate        | II  | 3.5*2.1       | 48       | 32       | 69.1    | 41       |
| 13  | Male   | 55  | Yes     | Yes        | moderate        | II  | 10*9*8        | 41       | 32       | 73.2    | 47.4     |
| 14  | Male   | 57  | Yes     | Yes        | moderate        | III | 19.5*15.1     | 38       | 76       | 64.6    | 39.9     |
| 15  | Male   | 42  | No      | Yes        | poorly          | III | 13*10         | 54       | 117      | 68.4    | 36.7     |
| 16  | Male   | 53  | No      | No         | moderate        | II  | 9.0*8.0       | 60       | 42       | 60.1    | 38.2     |
| 17  | Male   | 86  | No      | No         | moderate        | I   | 10*12         | 16       | 27       | 80.2    | 33.8     |
| 18  | Male   | 60  | No      | Yes        | well            | I   | 4*3           | 68       | 51       | 74      | 47.8     |
| 19  | Male   | 55  | No      | No         | poorly          | III | 1.4*2.5       | 39       | 29       | 66.6    | 42.4     |
| 20  | Male   | 75  | No      | No         | moderate        | III | 7.5*5.8       | 26       | 24       | 64.7    | 36.6     |
| 21  | Male   | 47  | Yes     | Yes        | moderate        | II  | 10*8          | 33       | 55       | 65.3    | 36       |
| 22  | Male   | 47  | No      | No         | poorly          | II  | 3.8*3.1; 4*2  | 59       | 87       | 42.3    | 25.1     |
